# Supplementary material for: Association between the geriatric nutritional risk index and all-cause mortality in elderly critically ill patients with ischemic stroke
Source: Research Square preprint supplement (doi:10.21203/rs.3.rs-8671348/v1), 2026-01-30
Supplement: Supplementary file 1 [file 4e19ff754c389458ba568efe.docx]

| Risk Variables | Missing number (%) | Risk Variables | Missing number (%) |
| --- | --- | --- | --- |
| Basophil | 692 (25.0%) | Race | 0 |
| Eosinophil | 692 (25.0%) | Height | 0 |
| Monocyte | 692 (25.0%) | Weight | 0 |
| Neutrophil | 692 (25.0%) | Heart failure | 0 |
| Lymphocyte | 692 (25.0%) | Hypertension | 0 |
| ALT | 860 (31.0%) | Sepsis | 0 |
| Total bilirubin | 1066 (38.5%) | Diabetes | 0 |
| AST | 860 (31.0%) | Myocardial infarction | 0 |
| APTT | 128 (4.63%) | Pneumonia | 0 |
| PT | 128 (4.63%) | COPD | 0 |
| INR | 128 (4.63%) | SOFA | 0 |
| Creatinine | 96 (3.48%) | APS III | 0 |
| Temperature | 63 (2.23%) | SAPS II | 0 |
| GCS | 0 | OASIS | 0 |
| Heart rate | 0 | Hemoglobin | 0 |
| Charlson | 0 | Ventilation | 0 |
| SBP | 70 (0.25%) | Platelet | 0 |
| DBP | 70 (0.25%) | WBC | 0 |
| MBP | 70 (0.25%) | Albumin | 0 |
| Respiration rate | 70 (0.25%) | Sodium | 0 |
| SpO2 | 70 (0.25%) | Potassium | 0 |
| Bun | 1 (0.05%) | Venous thrombus | 0 |
| Smoke | 0 | Aspirin | 0 |
| Gender | 0 | Statin | 0 |
| Age | 0 | Malignant cancer | 0 |
| Clopidogrel | 0 | AKI | 0 |
| Vasopressor | 0 | CRRT | 0 |

**Table S1. missing number for risk variables and outcome variables**

Abbreviation: Abbreviation: BMI, body mass index; HR, heart rate; GNRI, geriatric nutritional risk index; RR, respiratory rate; SBP, systolic blod pressure; DBP, diastolic blood pressure; WBC, white blood cell; PT, p**rothrombin time;** APTT, activated partial thromboplastin time; INR, international normalized ratio; AMI, acute myocardial infarction; AKI, acute kidney injury; COPD, chronic obstructive pulmonary disease; SOFA, sequential organ failure assessment; APS III, acute physiology score III; OASIS, oxford acute severity of illness score; GCS, glasgow coma scale; Charlson, charlson comorbidity index; CRRT, continuous renal replacement therapy; ACEI, angiotensin-converting-enzyme inhibitor;
